# Supplementary material
Source: PubMed Central journal article supplement (PMC9018894)

## APPENDIX

**Table S1** Disease definitions using ICD and SNOMED codes

|                            | ICD-codes |           |             |                                           | SNOMED codes                                                   |
|----------------------------|-----------|-----------|-------------|-------------------------------------------|----------------------------------------------------------------|
|                            | ICD-10    | ICD-9     | ICD-8       | ICD-7                                     |                                                                |
| Colorectal cancer          | C18-C21   | 153-154.1 | 153-154.1   | 153-154.0                                 | M81400-M81404, M81406, M81407, M81409, M81423, M81443, M81453  |
| Precancerous polyp         |           |           |             |                                           |                                                                |
| Non-advanced               | -         | -         | -           | -                                         | M82100, M82160, M82130                                         |
| Advanced                   | -         | -         | -           | -                                         | M82630, M82611, M82632, M82112, M82632, M82112, M82612, M81402 |
| Inflammatory bowel disease | K50-K51   | 555-556   | 563; 569,02 | 572,00; 572,09;<br>572,20; 572,21; 578,03 | T67-T68: D6255, D6214; T62-T68: D6216                          |

**Table S2** Definitions of baseline comorbidities within 5 years before start of follow-up

| Comorbidity                          | ICD-10 codes<br>(1997-) | ICD9<br>(1987-1996)           | ICD8<br>(1969-1986)           |
|--------------------------------------|-------------------------|-------------------------------|-------------------------------|
| Cardiovascular disease (CVD)         | I00-I99                 | 391-459                       | 391-458                       |
| Myocardial infarction                | I21-I22                 | 410                           | 410-411                       |
| Cancer (excluding Colorectal cancer) | C00-C17, C22-C99        | 140-152, 154.2-154.9, 155-209 | 140-152, 154.1-154.9, 155-209 |
| Diabetes                             | E10-E14                 | 250                           | 250                           |
| Neurologic disease                   | G10-G99                 | 294-319                       | 294-315                       |

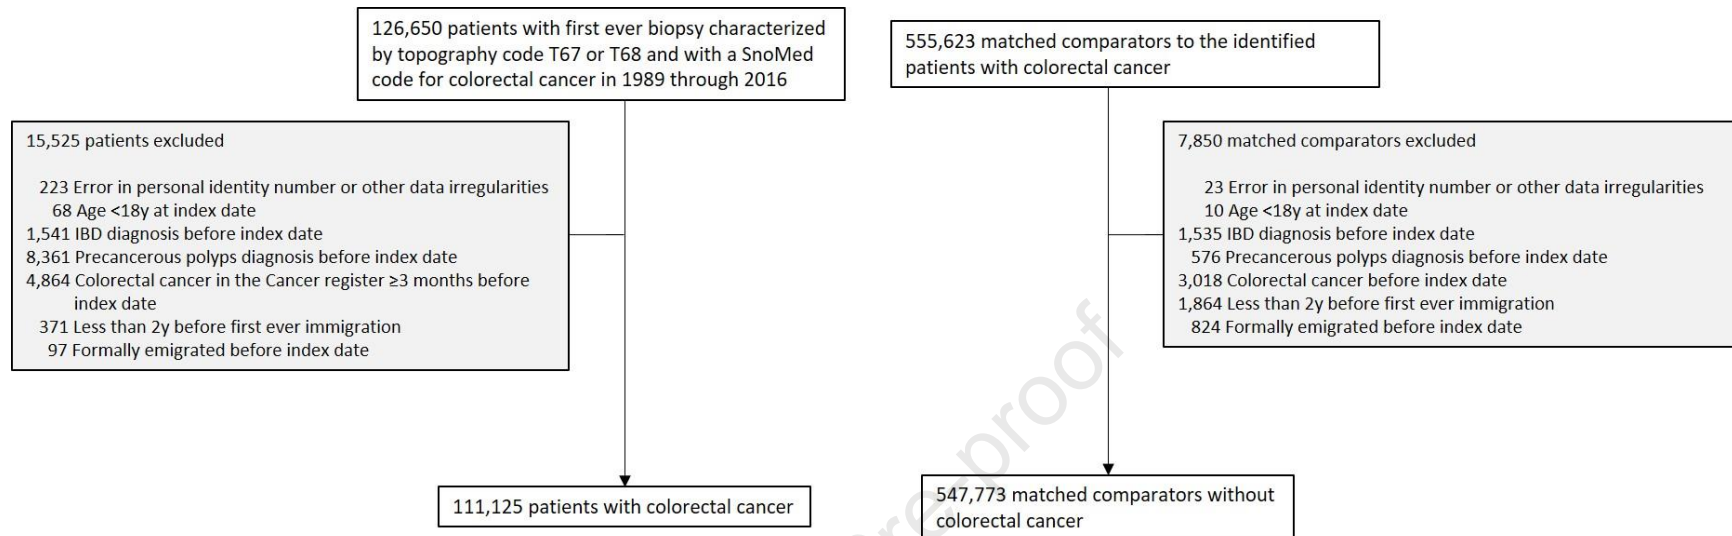

**Figure S1** Flow chart of identified patients with chronic constipation\* and their matched comparators

\*defined as:  $\geq 2$  visits ever for any constipation using the ICD-9 code 564.xx or the ICD-10 code K59.xx in inpatient or non-primary outpatient care starting in 1987 (when ICD-9 was introduced in Sweden). Similar to, we required the first constipation diagnosis to occur  $\geq 2$  years before the CRC diagnosis (or matching date for controls), and the second constipation diagnosis needed to occur  $\geq 6$  months before the CRC diagnosis or matching date.

**Table S3 SENSITIVITY ANALYSES** Prevalence and odds ratio of chronic constipation using diagnostic codes in patients with colorectal cancer and matched comparators

| Group                                                                     | N       |             | N exposed (%) |             | Odds ratio*<br>(95%CI) | Odds ratio**<br>(95%CI) |
|---------------------------------------------------------------------------|---------|-------------|---------------|-------------|------------------------|-------------------------|
|                                                                           | CRC     | Comparators | CRC           | Comparators |                        |                         |
| Main sensitivity analysis                                                 | 111 125 | 547 773     | 178 (0.16%)   | 984 (0.18%) | 0.88 (0.75-1.04)       | 0.88 (0.75-1.04)        |
| Main sensitivity analysis + constipation as main diagnosis (≥2 diagnoses) | 111 125 | 547 773     | 112 (0.10%)   | 637 (0.12%) | 0.86 (0.70-1.05)       | 0.86 (0.70-1.05)        |
| Sensitivity analysis II                                                   | 111 125 | 547 773     | 190 (0.17%)   | 921 (0.17%) | 1.01 (0.86-1.18)       | 1.01 (0.86-1.18)        |
| Sensitivity analysis III                                                  | 38 201  | 187 855     | 58 (0.15%)    | 246 (0.13%) | 1.16 (0.87-1.54)       | 1.18 (0.88-1.57)        |
| Varying time between 2 constipation diagnoses                             |         |             |               |             |                        |                         |
| 6-12 months                                                               | 111 125 | 547 773     | 41 (0.04%)    | 164 (0.03%) | 1.23 (0.87-1.73)       | 1.23 (0.87-1.73)        |
| 1-5 years                                                                 | 111 125 | 547 773     | 67 (0.06%)    | 385 (0.07%) | 0.85 (0.66-1.11)       | 0.85 (0.66-1.11)        |
| ≥5 years                                                                  | 111 125 | 547 773     | 34 (0.03%)    | 156 (0.03%) | 1.06 (0.73-1.54)       | 1.06 (0.73-1.54)        |

CRC, colorectal cancer.

\*Conditioned on matching set (age, sex, county, and calendar period);

\*\*Conditioned on matching set and further adjusted for education;

\*\*\*Restricted to individuals with CRC diagnosed in July 2007 or later (or comparators matched on this date or later)

**Main sensitivity analysis:** First constipation diagnosis must occur ≥2 years before index date and 2<sup>nd</sup> constipation diagnosis must occur ≥6 months before index date;

**Sensitivity analysis II:** ≥2 visits for constipation within 12 months between any 2 constipation diagnoses;

**Sensitivity analysis III:** Sensitivity analysis I + ≥2 prescriptions of laxatives (ATC code A06A) during an 18-month period starting 6 months before the index date, in patients and comparators with index date from 01 Jan, 2008

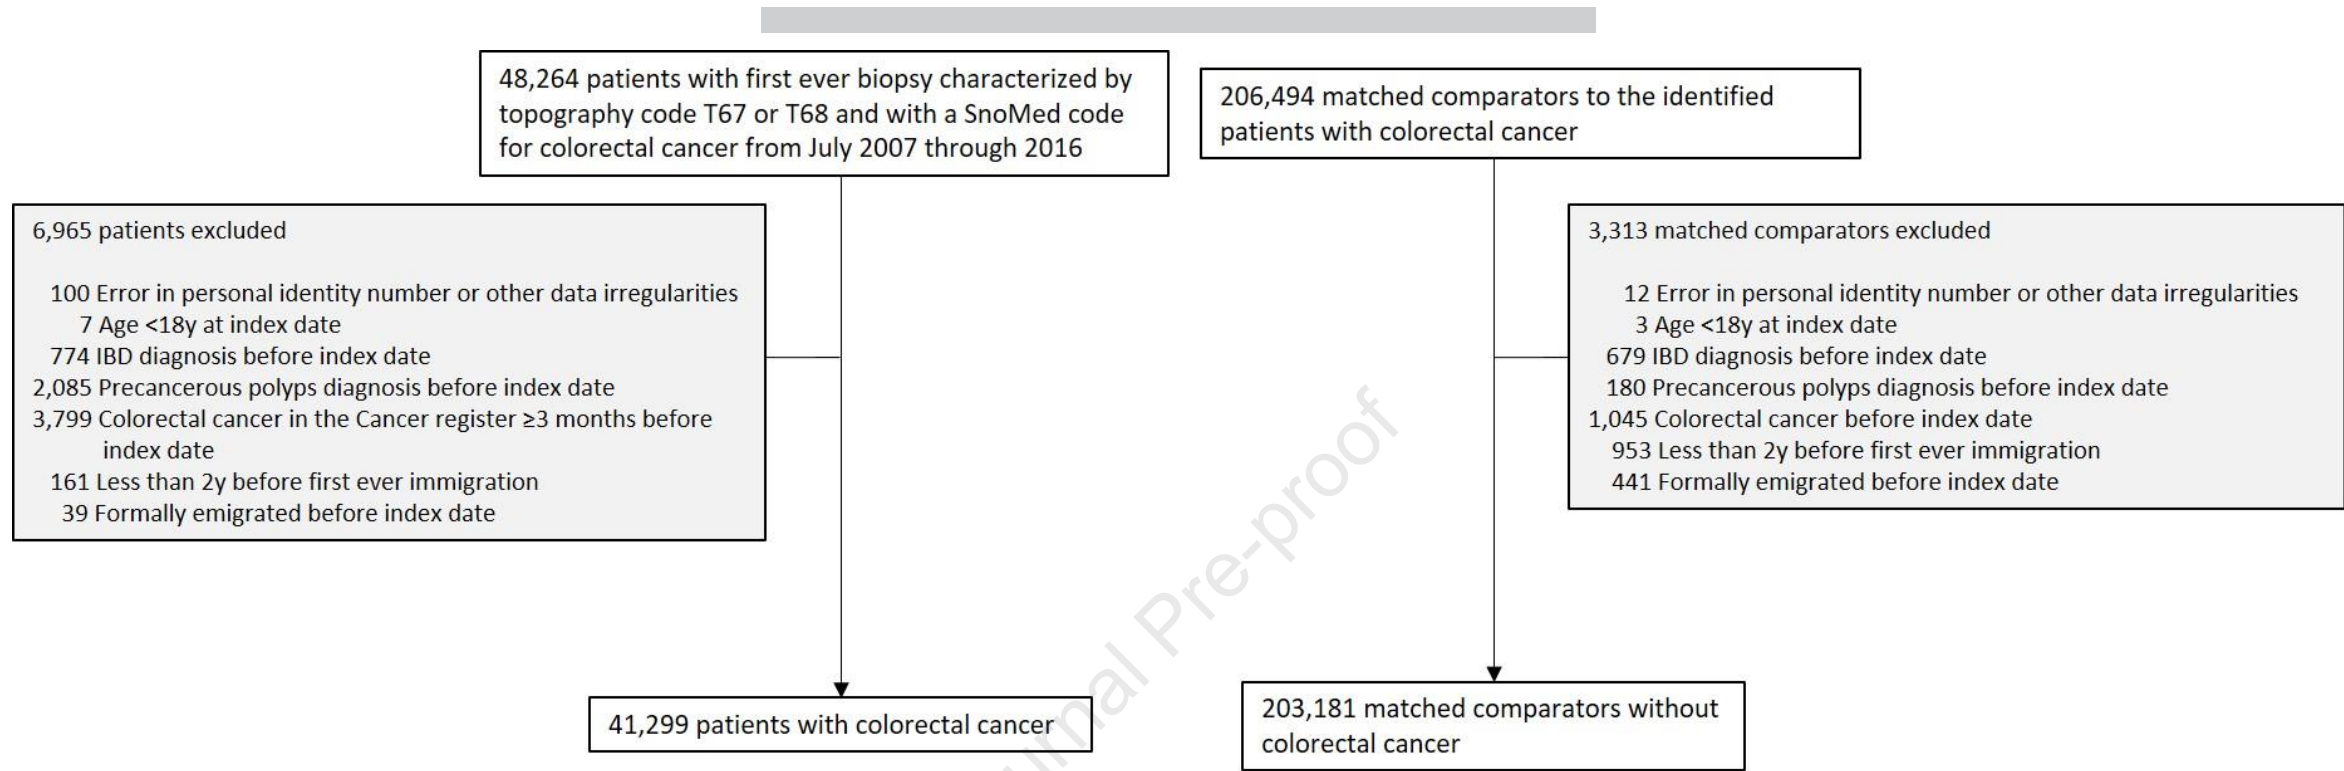

Supplement: NIHMS1749933-supplement-1.pdf [file NIHMS1749933-supplement-1.pdf]
